# Supplementary material for: Effect of cognitive reserve on the association between slow wave sleep and cognition in community-dwelling older adults
Source: publisher site journal article supplement (doi:10.18632/aging.204943), 2023-09-28
Supplement: Supplementary file [file aging-v15i18-204943-supplementary-material-SD1.pdf]

SUPPLEMENTARY FIGURE

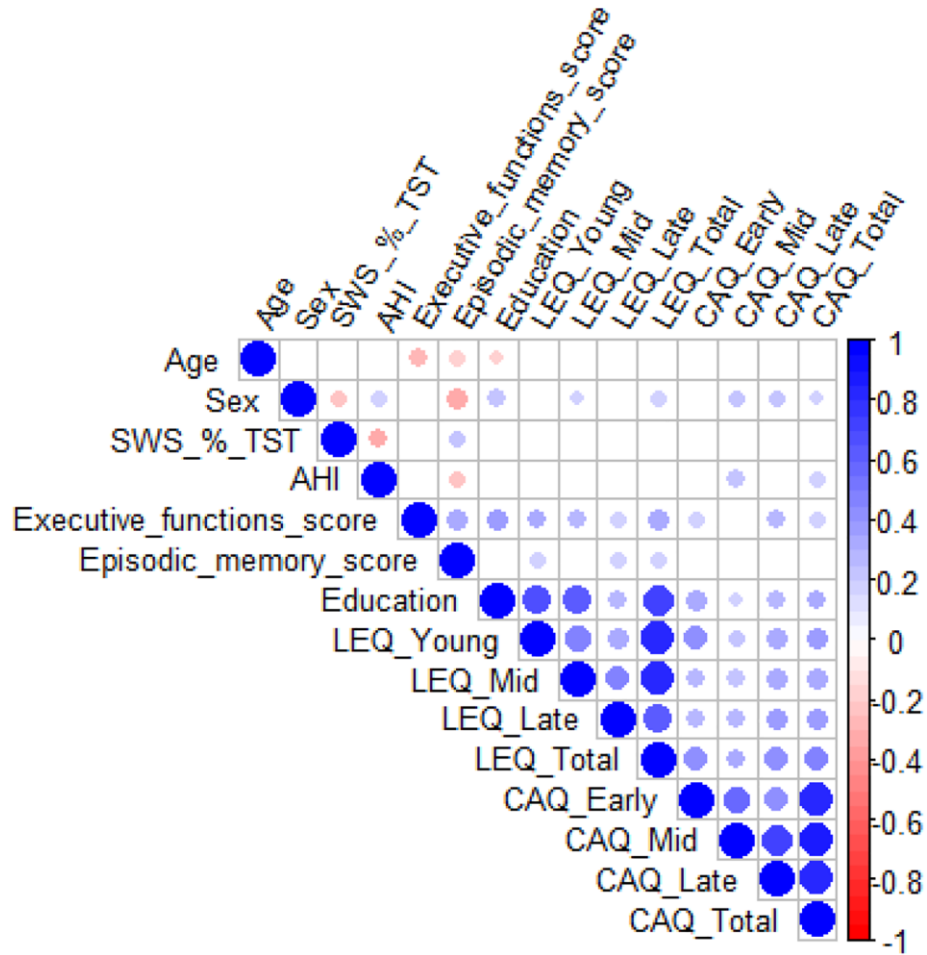

**Supplementary Figure 1. Simple linear regressions matrix between demographics, sleep, cognition and cognitive reserve proxies.** Standardized  $\beta$  coefficients are indicated in blue (positive) or red (negative) or white when  $p > 0.05$ . Numerical values of Sex are F = 0 and M = 1. Abbreviations: LEQ: Lifetime of Experiences Questionnaire; CAQ: Cognitive Activities Questionnaire; SWS: Slow Wave Sleep; TST: total sleep time; AHI: Apnea Hypopnea Index. Mid refers to midlife.
